# Supplementary material
Source: PubMed Central journal article supplement (PMC3799376)
Supplement: 1309276110_pnas.201309276SI.pdf [file 1309276110_pnas.201309276SI.pdf]

# Supporting Information

Wei et al. 10.1073/pnas.1309276110

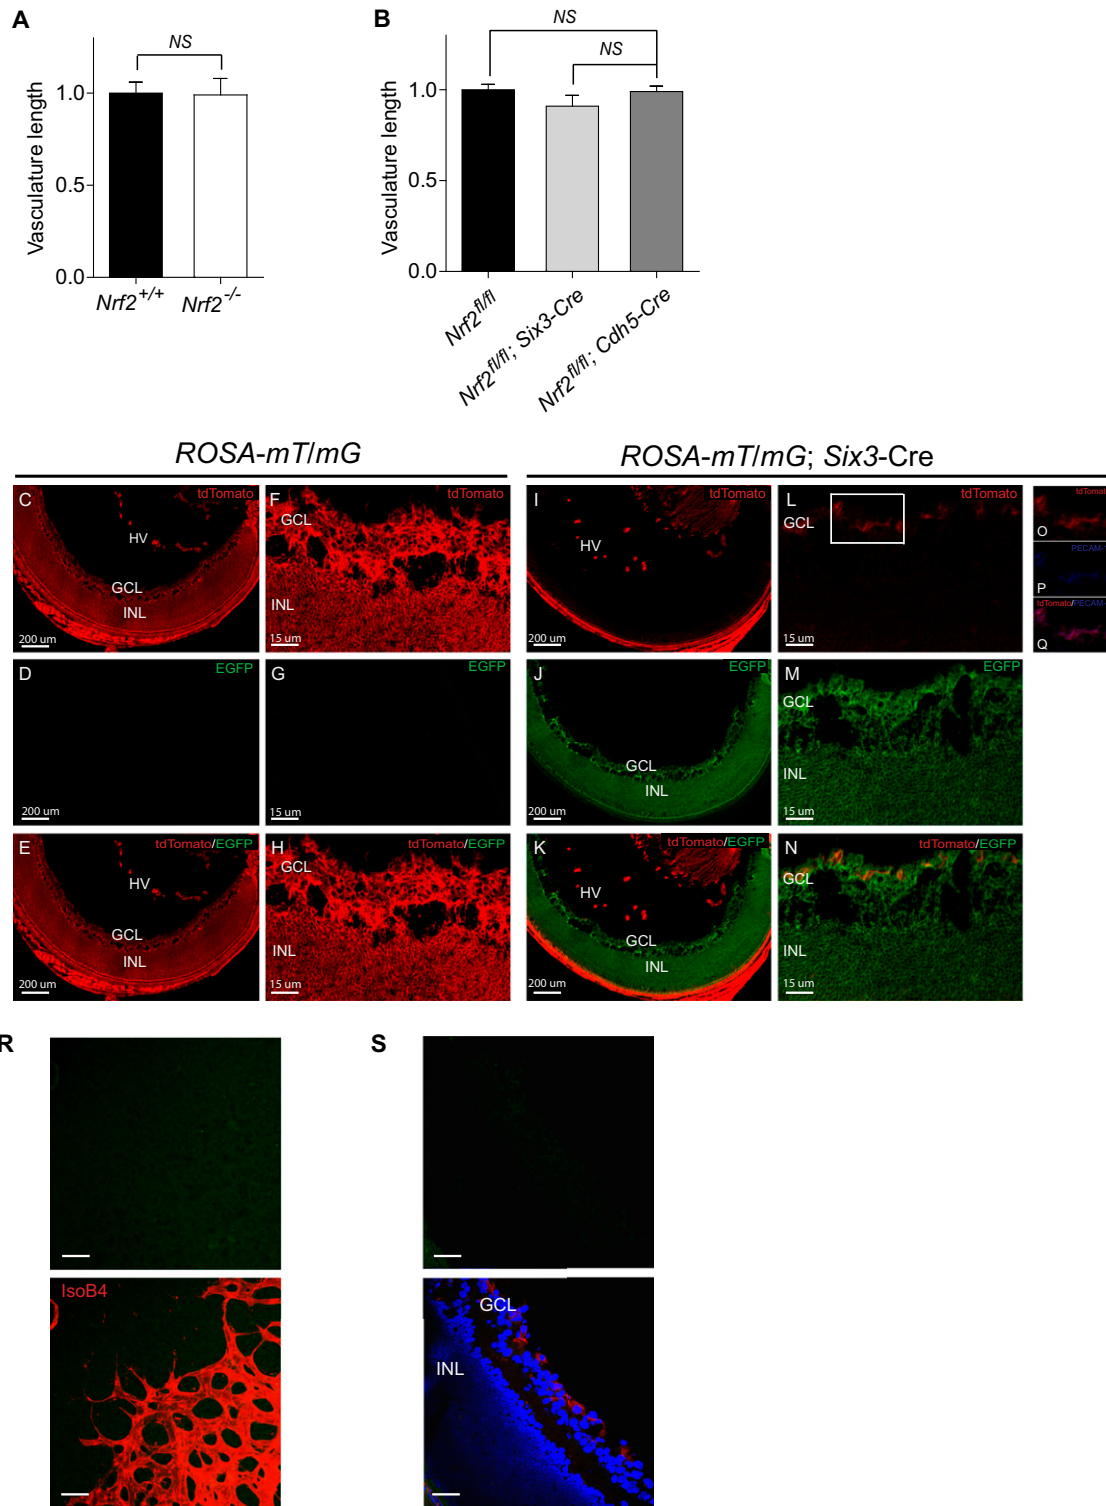

**Fig. S1.** (A and B) No effect on retinal vasculature length by genetic deletion of NF-E2-related factor 2 (*Nrf2*). Quantification of vasculature length in wild-type (WT) (*Nrf2*<sup>+/+</sup>) and *Nrf2*<sup>-/-</sup> (A), control [*Nrf2*<sup>fl/fl</sup> (*Nrf2*<sup>fl/fl</sup>)], *Nrf2*<sup>fl/fl</sup>; *Six3-Cre*, and *Nrf2*<sup>fl/fl</sup>; *Cdh5-Cre* (B) retinas at postnatal day (P) 5. (C–Q) Cre activity is Legend continued on following page

present in nonvascular tissue in *Six3-Cre* retina. (C–H) Retinal cryosections from *ROSA-mT/mG* mice at P5. Strong red fluorescence (tdTomato) was evident in the entire retina as well as hyaloid vessels (HV; C, E, F, and H), whereas EGFP was absent (D, E, G, and H). (I–Q) Retinal cryosections from *ROSA-mT/mG;Six3-Cre* mice at P5. The red fluorescence (tdTomato) was absent in the retina except in the vasculature (I, K, L, and N), and green fluorescence (i.e., EGFP) was evident instead in nonvascular retina (J, K, M, and N). Retinal vessels (L and N) and HV (I and K) expressed tdTomato. Staining with endothelial marker PECAM-1 verified the colocalization of tdTomato and PECAM-1 on retinal vessels, indicating the lack of cre activity in endothelial cells (ECs; L, Inset; O–Q). (R and S) Retinal flat-mount (R) and cryosection (S) stained with only secondary antibody and isolectin B4 using the Mouse on Mouse Fluorescein Kit described in *Materials and Methods*. No signal was detected with secondary antibody only. (Scale bar, 50  $\mu$ m.) Data are presented as mean  $\pm$  SEM ( $n = 4$ ; NS, not significant).

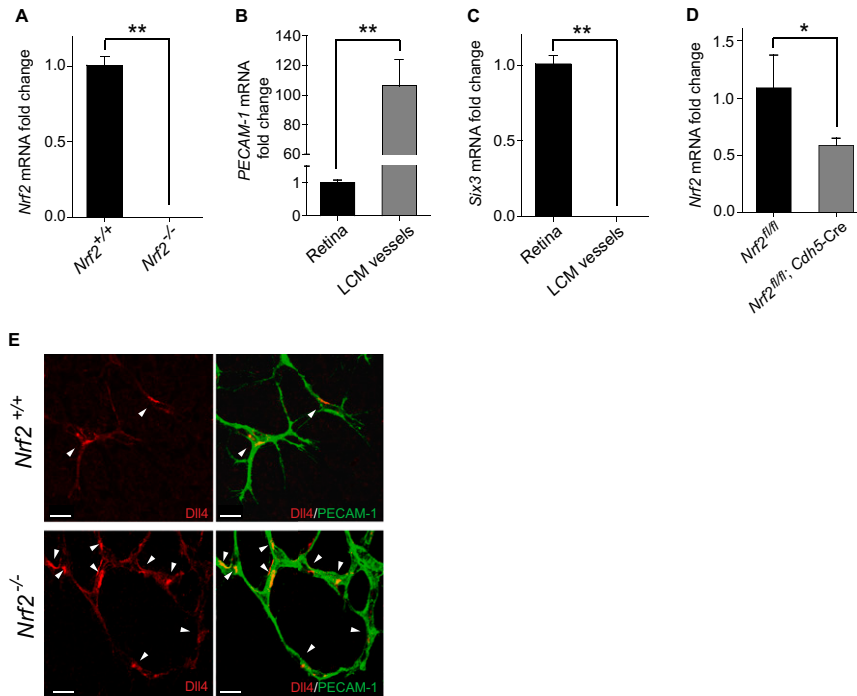

**Fig. S2.** (A) Quantitative RT-PCR analysis of WT *Nrf2* in *Nrf2*<sup>+/+</sup> and *Nrf2*<sup>-/-</sup> retina. (B and C) Quantitative RT-PCR analysis of *PECAM-1* (B) and *Six3* (C) in retina and microdissected retinal vessels from *Nrf2*<sup>fl/fl</sup>; *Cdh5-Cre* mice. (D) Quantitative RT-PCR analysis of WT *Nrf2* in microdissected vessels from control (*Nrf2*<sup>fl/fl</sup>) and *Nrf2*<sup>fl/fl</sup>; *Cdh5-Cre* retinas at P5 ( $n = 4$ ). (E) whole-mount immunofluorescence for Dll4 (red) and PECAM-1 (green) in P5 retinas. Increased Dll4 expression was observed in the angiogenic front (arrowheads) in *Nrf2*<sup>-/-</sup> retinas compared with control. (Scale bar, 25  $\mu$ m.) Data are presented as mean  $\pm$  SEM (\* $P < 0.05$  and \*\* $P < 0.01$ ).
